# Supplementary material for: White and wonderful? Microplastics prevail in snow from the Alps to the Arctic
Source: PubMed Central journal article supplement — Sci Adv. 2019 Aug 14;5(8):eaax1157. doi: 10.1126/sciadv.aax1157 (PMC6693909; doi:10.1126/sciadv.aax1157), 2019-08-14
Supplement: aax1157_SM.pdf [file aax1157_SM.pdf]

## Supplementary Materials for

### White and wonderful? Microplastics prevail in snow from the Alps to the Arctic

Melanie Bergmann\*, Sophia Mützel, Sebastian Primpke, Mine B. Tekman, Jürg Trachsel, Gunnar Gerdts

\*Corresponding author. Email: [melanie.bergmann@awi.de](mailto:melanie.bergmann@awi.de)

Published 14 August 2019, *Sci. Adv.* **5**, eaax1157 (2019)

DOI: [10.1126/sciadv.aax1157](https://doi.org/10.1126/sciadv.aax1157)

#### The PDF file includes:

Fig. S1. Length frequency (%) of microfibers found in Arctic and European snow.

Note S1. Calculation of propagation of uncertainty of results regarding possible contamination.

Table S1. Concentration of MPs, fibers polymer types, and other particles detected in snow samples.

#### Other Supplementary Material for this manuscript includes the following:

(available at [advances.sciencemag.org/cgi/content/full/5/8/eaax1157/DC1](https://advances.sciencemag.org/cgi/content/full/5/8/eaax1157/DC1))

Table S2 (Microsoft Excel format). Concentration of MPs, fibers, polymer types, and other particles detected in snow samples as well as size frequency distribution and metadata.

Table S3 (Microsoft Excel format). Number, size, and color of fibers measured in Arctic and European snow samples.

Table S4 (Microsoft Excel format). Concentration, composition, and size of MPs detected in blank samples.

**Table S1. Concentration of MPs, fibers polymer types, and other particles detected in snow samples.** All values are given as N L<sup>-1</sup> unless stated otherwise. Some values diverge slightly as a result of rounding calculations (see Supplementary Table 2 for data based on non-rounded values and calculations).

|                                          | Ice Floe |       |       |       |       |       |       |       |       | Svalbard |       |       |       |       | Heligoland |        | Bremen | Bavaria |        |        | Tschuggen | Davos |
|------------------------------------------|----------|-------|-------|-------|-------|-------|-------|-------|-------|----------|-------|-------|-------|-------|------------|--------|--------|---------|--------|--------|-----------|-------|
|                                          | 1        | 2     | 3     | 4     | 5     | 6     | 7     | 8     | 9     | 1        | 2     | 3     | 4     | 5     | 1          | 2      |        | 1       | 2      | 3      |           |       |
| Filtrated volume [L]                     | 0.078    | 0.014 | 0.204 | 0.008 | 0.092 | 0.061 | 0.125 | 0.140 | 0.015 | 0.106    | 0.010 | 0.195 | 0.246 | 0.016 | 0.006      | 0.005  | 0.058  | 0.042   | 0.038  | 0.018  | 0.11      | 0.028 |
| Total particles [N]                      | 11       | 10    | 53    | 776   | 266   | 324   | 495   | 7187  | 579   | 763      | 194   | 1303  | 3953  | 120   | 3048       | 2795   | 4372   | 6770    | 8873   | 5498   | 1591      | 1258  |
| Polymer particle [N]                     | 10       | 0     | 4     | 5     | 20    | 14    | 11    | 26    | 216   | 39       | 7     | 165   | 30    | 18    | 66         | 88     | 115    | 109     | 5903   | 107    | 21        | 76    |
| Total MPs [N L <sup>-1</sup> ]           | 124      | 0     | 20    | 602   | 218   | 230   | 88    | 186   | 14400 | 369      | 680   | 846   | 122   | 1111  | 11786      | 17600  | 2000   | 2627    | 154137 | 6114   | 191       | 2676  |
| MPs [%]                                  | 87.9     | 0.0   | 7.5   | 0.6   | 7.5   | 4.3   | 2.2   | 0.4   | 37.3  | 5.1      | 3.6   | 12.7  | 0.8   | 15    | 2.2        | 3.1    | 2.6    | 1.6     | 66.5   | 1.9    | 1.3       | 6     |
| Fibers [N L <sup>-1</sup> ]              | 85       | 383   | 43    | 10186 | 774   | 584   | 121   | 123   | 145   | 579      | 1498  | 181   | 103   | 130   | 838        | 2745   | 1927   | 210     | 1537   | 2573   | 690       | 931   |
| Polyethylene                             | 23       | 0     | 0     | 0     | 0     | 16    | 0     | 0     | 0     | 9        | 0     | 113   | 4     | 62    | 536        | 400    | 52     | 651     | 11193  | 0      | 9         | 70    |
| Polyethylene oxidized                    | 0        | 0     | 0     | 0     | 11    | 0     | 0     | 0     | 133   | 0        | 0     | 0     | 0     | 0     | 0          | 0      | 17     | 193     | 1348   | 0      | 0         | 0     |
| Polyethylene chlorinated                 | 0        | 0     | 0     | 0     | 0     | 0     | 8     | 7     | 0     | 0        | 0     | 15    | 0     | 0     | 0          | 0      | 0      | 0       | 1817   | 0      | 0         | 35    |
| Polypropylene                            | 0        | 0     | 0     | 0     | 0     | 16    | 16    | 93    | 0     | 19       | 0     | 5     | 4     | 0     | 536        | 3800   | 17     | 24      | 38     | 0      | 9         | 0     |
| Polystyrene                              | 0        | 0     | 0     | 0     | 0     | 0     | 0     | 0     | 0     | 0        | 0     | 10    | 41    | 62    | 0          | 0      | 0      | 0       | 0      | 0      | 0         | 0     |
| Polycarbonate                            | 0        | 0     | 0     | 0     | 0     | 0     | 0     | 0     | 67    | 0        | 0     | 0     | 0     | 0     | 0          | 0      | 0      | 0       | 0      | 0      | 0         | 0     |
| Polyamide                                | 0        | 0     | 0     | 0     | 153   | 49    | 0     | 0     | 0     | 9        | 0     | 82    | 28    | 0     | 357        | 400    | 139    | 867     | 21571  | 1486   | 55        | 352   |
| Polyvinylchloride                        | 0        | 0     | 0     | 0     | 0     | 0     | 0     | 86    | 0     | 0        | 0     | 0     | 0     | 0     | 0          | 0      | 0      | 0       | 0      | 0      | 0         | 0     |
| Cellulose chemical modified              | 0        | 0     | 0     | 0     | 11    | 0     | 0     | 0     | 0     | 19       | 97    | 26    | 0     | 0     | 0          | 200    | 52     | 0       | 430    | 57     | 0         | 0     |
| Nitrile rubber                           | 0        | 0     | 5     | 241   | 22    | 66    | 32    | 0     | 0     | 218      | 485   | 144   | 0     | 741   | 3750       | 12200  | 17     | 72      | 1172   | 57     | 0         | 739   |
| Polyester                                | 75       | 0     | 0     | 0     | 11    | 16    | 0     | 0     | 0     | 9        | 0     | 62    | 20    | 185   | 357        | 0      | 0      | 48      | 62     | 57     | 0         | 35    |
| Acrylates/polyurethane s/varnish/lacquer | 14       | 0     | 10    | 361   | 0     | 16    | 0     | 0     | 11200 | 47       | 97    | 77    | 12    | 0     | 2321       | 200    | 1548   | 72      | 3389   | 4400   | 55        | 458   |
| Polychloroprene                          | 0        | 0     | 0     | 0     | 0     | 0     | 0     | 0     | 0     | 0        | 0     | 0     | 0     | 0     | 0          | 0      | 0      | 0       | 0      | 0      | 0         | 35    |
| Polylactic acid                          | 0        | 0     | 0     | 0     | 0     | 0     | 0     | 0     | 0     | 9        | 0     | 0     | 0     | 0     | 0          | 0      | 0      | 0       | 0      | 0      | 0         | 0     |
| Polycaprolactone                         | 0        | 0     | 0     | 0     | 0     | 0     | 0     | 0     | 67    | 0        | 0     | 0     | 0     | 0     | 0          | 0      | 0      | 0       | 0      | 0      | 0         | 246   |
| Ethylene-vinyl-acetate                   | 0        | 0     | 5     | 0     | 0     | 0     | 8     | 0     | 867   | 0        | 0     | 82    | 0     | 0     | 536        | 400    | 104    | 24      | 415    | 57     | 18        | 176   |
| Polyimide                                | 0        | 0     | 0     | 0     | 0     | 0     | 0     | 0     | 0     | 0        | 0     | 0     | 4     | 0     | 0          | 0      | 0      | 0       | 0      | 0      | 0         | 0     |
| Rubber type 1                            | 13       | 0     | 0     | 0     | 11    | 0     | 0     | 0     | 0     | 0        | 0     | 0     | 0     | 0     | 0          | 0      | 0      | 24      | 31097  | 0      | 0         | 70    |
| Rubber type 3                            | 0        | 0     | 0     | 0     | 0     | 49    | 24    | 0     | 2067  | 28       | 0     | 231   | 8     | 62    | 3393       | 0      | 52     | 651     | 81606  | 0      | 45        | 458   |
| Animal fur                               | 0        | 65    | 0     | 482   | 218   | 1492  | 152   | 15579 | 533   | 284      | 1359  | 1944  | 14469 | 1667  | 25179      | 21000  | 6226   | 106747  | 2229   | 124114 | 8245      | 16373 |
| Charcoal                                 | 0        | 0     | 0     | 0     | 0     | 0     | 0     | 0     | 0     | 9        | 0     | 5     | 0     | 0     | 3036       | 4400   | 0      | 0       | 5144   | 286    | 0         | 669   |
| Coal                                     | 0        | 0     | 0     | 0     | 0     | 0     | 0     | 0     | 0     | 9        | 0     | 72    | 4     | 123   | 0          | 0      | 0      | 0       | 0      | 0      | 0         | 0     |
| Chitin                                   | 0        | 0     | 0     | 0     | 11    | 66    | 0     | 3786  | 0     | 123      | 194   | 179   | 256   | 62    | 4107       | 13400  | 261    | 3614    | 399    | 1143   | 82        | 4225  |
| Plant fibers                             | 6        | 611   | 218   | 64096 | 1561  | 3246  | 3192  | 31771 | 23467 | 5440     | 9029  | 2923  | 1233  | 2469  | 455357     | 400400 | 67339  | 49880   | 67048  | 182114 | 5927      | 16866 |
| Sand                                     | 11       | 73    | 24    | 28313 | 895   | 279   | 528   | 14    | 200   | 984      | 7573  | 713   | 4     | 1975  | 44821      | 102200 | 209    | 265     | 2715   | 400    | 18        | 3486  |

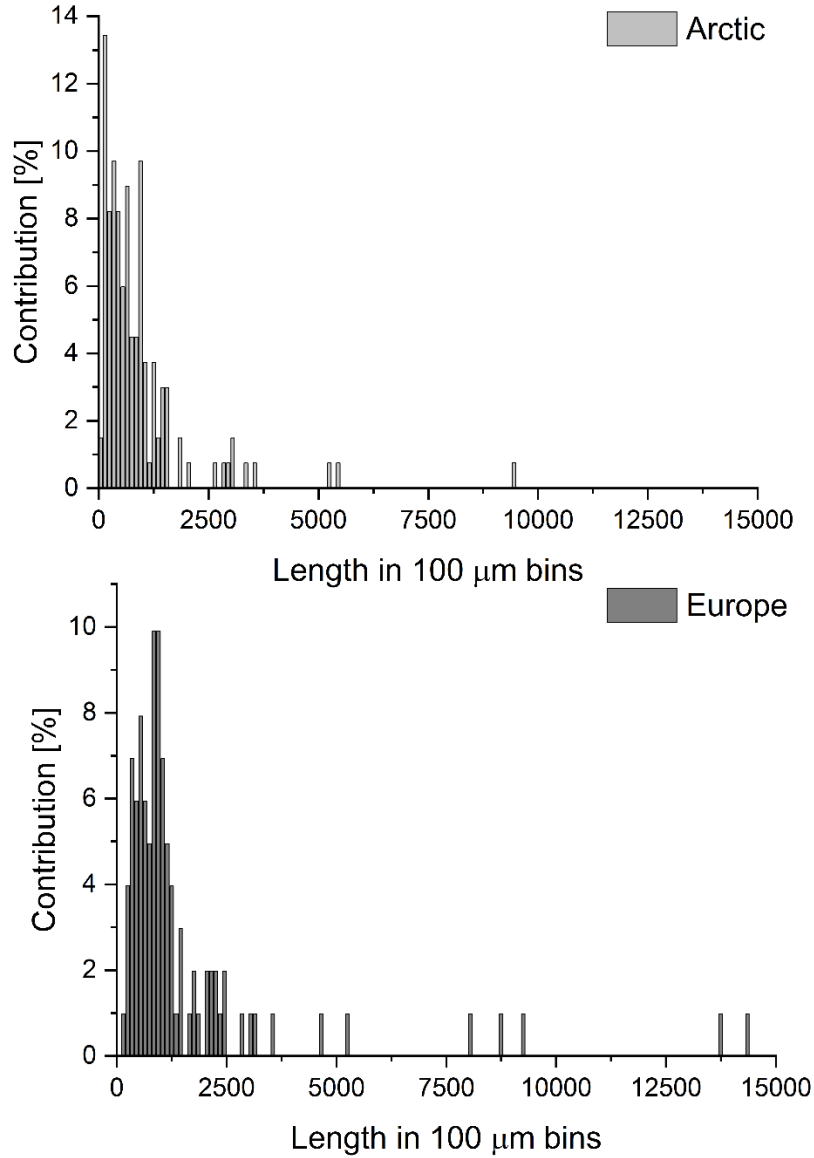

**Fig. S1. Length frequency (%) of microfibers found in Arctic and European snow.** Each bar represents a size bin of 100  $\mu\text{m}$ . Note: these fibers were not identified as polymers.

**Note S1. Calculation of propagation of uncertainty of results regarding possible contamination.** To address uncertainties due to the missing field blanks we calculated the uncertainty of our values with regards to the error of particle numbers of FTIR (5%,  $N(FTIR)$ ), the filtration process and the minimum number ( $N(Low. N.) = 5$  of Ice Floe 4) found in samples from glass containers following an approach similar to (45) using the following equation;

$$\Delta N(Snow) = \sqrt{\left(\frac{1}{V^2} \times (N(FTIR) + N(Low. N.))\right)^2 + \left(\frac{N}{-V^2} \times \Delta V\right)^2}$$

This calculation lead to an average relative error of 37% of the presented values, while sample with low numbers of particles detected were generally having a higher value. Only two samples showed a relative error value above 100% (Ice Floe 3 and 4). Ice Floe 3 was already blank-corrected while Ice Floe 4 showed the lowest number of particles.
